# Supplementary material
Source: publisher figshare collection journal article supplement (https://gsapubs.figshare.com/ndownloader/files/34471217)
Supplement: Supplementary file 1 [file 34471217]

## Sheet: Sheet1
SUPPLEMENTARY TABLE 1. MODAL MINERAL ABUNDANCES
Sample number	Texture*	Quartz	K-feldspar	Plagioclase	Biotite	Titanite	Opaques	Sericite	Amphibole	Apatite	Groundmass	Void space	Clay pockets		Zircon	Chlorite	Pyrite	Hematite	Rutile	Epidote	Allanite	Fine-grained quartz	Calcite
		Major minerals (modal %)													Accessory minerals
Little Cottonwood stock
CH-064	Phan-M	22.3	40.7	32	3.2	0.5	0.1	0	1.1	minor	no	no	no		yes	yes	no	no	no	yes	yes	no	N.D.
CH-070A	N.D.	N.D.	N.D.	N.D.	N.D.	N.D.	N.D.	N.D.	N.D.	N.D.	N.D.	N.D.	N.D.		N.D.	N.D.	N.D.	N.D.	N.D.	N.D.	N.D.	N.D.	N.D.
CH-072	Seriate	25.6	13.8	48.9	7.1	0.8	1	0.4	1.6	0.3	no	no	no		yes	yes	no	no	no	yes	yes	yes	no
CH-073	Phan	22.8	9.8	51.7	8.2	0.5	1.9	1.9	1.5	0.8	no	no	no		yes	yes	N.D.	no	no	yes	yes	no	no
CH-074	Por	20.5	6	43.8	5.9	1.1	1.4	minor	1.2	0.3	18.8	no	no		yes	yes	no	no	no	yes	yes	yes	no
CH-140	Phan	26.5	12.8	49.3	7	1.2	1.1	0.7	0.1	0.4	no	no	no		yes	yes	minor	no	no	yes	yes	no	N.D.
CH-141	N.D.	N.D.	N.D.	N.D.	N.D.	N.D.	N.D.	N.D.	N.D.	N.D.	N.D.	N.D.	N.D.		N.D.	N.D.	N.D.	N.D.	N.D.	N.D.	N.D.	N.D.	N.D.
CH-144	Seriate	35	6.6	48.7	6.1	0.7	1	1	0.1	0.4	no	no	no		yes	yes	yes	yes	no	yes	yes	yes	N.D.
CH-154 A	Phan	9	43.3	43.5	2.4	0.1	0.3	minor	0.8	minor	no	no	no		yes	yes	N.D.	no	no	yes	yes	no	N.D.
CH-154B	Phan	29.6	22	36.2	7.7	0.9	0.4	minor	2.2	0.5	no	no	no		yes	yes	N.D.	no	no	yes	yes	no	no
CH-154C	Phan-seriate	44.1	21.1	23.2	8.2	0.7	0.8	minor	1.6	0.1	no	no	no		yes	minor	N.D.	no	no	yes	yes	no	no
Average	N/A	26.1556	19.5667	41.9222	6.2	0.722222	0.888889	0.8	1.13333	0.4	18.8	N.A.	N.A.		N.A.	N.A.	N.A.	N.A.	N.A.	N.A.	N.A.	N.A.	N.A.
Red Pine porphyry
CH-053	Por-Seriate	28	11	52.7	4.6	0.3	1.7	0.8	no	0.1	no	no	no		yes	yes	yes	yes	yes	yes	yes	yes	no
CH-115	Por-aph-M	10.4	21.6	17.4	no	no	1.1	5.6	no	0.1	43.2	yes	yes		yes	no	yes	yes	yes	no	N.D.	yes	no
CH-118	Por-aph	10.7	3.7	26.1	no	minor	no	5.8	no	minor	52	yes	yes		yes	no	yes	yes	yes	no	yes	yes	no
Average	N/A	16.3667	12.1	32.0667	4.6	0.3	1.4	4.06667	no	0.1	47.6	N.A.	N.A.		N.A.	N.A.	N.A.	N.A.	N.A.	N.A.	N.A.	N.A.	N.A.
White Pine intrusion
CH-031	N.D.	N.D.	N.D.	N.D.	N.D.	N.D.	N.D.	N.D.	N.D.	N.D.	N.D.	N.D.	N.D.		N.D.	N.D.	N.D.	N.D.	N.D.	N.D.	N.D.	N.D.	N.D.
CH-041	N.D.	N.D.	N.D.	N.D.	N.D.	N.D.	N.D.	N.D.	N.D.	N.D.	N.D.	N.D.	N.D.		N.D.	N.D.	N.D.	N.D.	N.D.	N.D.	N.D.	N.D.	N.D.
CH-041-2	Phan-Por	34.7	12.8	39.5	3.4	0.2	0.7	1.4	no	0.2	6.6	0.2	0.2		yes	yes	yes	yes	no	yes	yes	yes	no
CH-043-2	Phan	33.3	12.2	47.3	3.8	0.6	1.5	0.7	no	0.1	no	no	0.2		yes	yes	yes	no	no	no	yes	no	no
CH-067A	Seriate	yes	yes	yes	minor	minor	minor	yes	no	no	yes	yes	yes		yes	no	minor	yes	yes	yes	no	yes	no
CH-067B	Seriate	25	17.4	46.4	4.1	0.2	2.4	3.7	no	0.2	no	yes	no		yes	no	minor	yes	no	yes	no	no	N.D.
CH-068A	Por-Seriate	yes	yes	yes	yes	relict	minor	yes	no	no	yes	yes	yes		yes	no	minor	yes	yes	no	yes	yes	no
CH-068B	Por-Seriate	39	3	37.3	2.1	minor	0.6	4.3	no	0.1	12.4	minor	yes		yes	no	yes	yes	no	no	no	yes	N.D.
CH-069	Phan-Por-M	25	10.3	40.5	2	minor	0.4	5.4	no	0.1	15.7	yes	no		yes	no	yes	no	yes	yes	no	yes	no
CH-070B	Por	10.8	32	8	no	minor	yes	4.4	no	no	42	yes	yes		yes	no	no	no	yes	no	no	yes	N.D.
CH-071	Por-Seriate	29.3	12.1	51.3	3.4	0.4	0.6	1.7	no	0.3	no	no	no		yes	yes	minor	yes	no	yes	yes	yes	no
CH-107	Por	22.6	1.5	33.9	no	relict	0.2	10.5	no	yes	27.4	1.4	0.3		yes	no	yes	no	yes	no	no	yes	2.2
CH-108	Phan-Seriate	28.5	13.1	41.2	0.6	minor	1.8	13.8	no	0.5	no	no	no		yes	yes	yes	yes	N.D.	yes	yes	minor	no
CH-111	Por-seriate	12.6	4.7	47	0	N.D.	1.5	8.9	no	minor	24	0.2	0.4		yes	yes	yes	yes	no	no	no	yes	yes
CH-114	Phan	16.9	58.9	0.9	no	minor	0.5	18.2	no	no	no	2.3	2.2		yes	no	yes	yes	no	no	no	no	no
CH-125	Phan-Seriate	28.6	17.4	44.7	6	0.3	1.4	0.5	no	0.2	no	no	no		yes	yes	yes	yes	no	yes	yes	no	no
CH-126	Seriate-M	27	25.8	40.7	2.4	relict	2	1.8	no	0.2	no	no	no		yes	yes	yes	yes	yes	yes	yes	no	no
CH-127	Phan	28.3	15	46.6	7.4	minor	1.3	0.5	no	0.2	no	no	no		yes	yes	yes	yes	yes	yes	yes	no	no
CH-128	Phan	27.1	16.5	46.5	5.8	minor	1.1	1.6	no	0.2	no	0.1	1.1		yes	yes	yes	yes	yes	no	yes	no	no
CH-129	Seriate	33.3	14.5	46.7	1.8	minor	0.9	2.4	no	0.3	no	no	no		yes	yes	yes	yes	no	yes	no	no	yes
CH-130	Seriate	30.8	20	41.4	no	minor	1.4	5.7	no	0.3	0.2	no	no		yes	no	yes	yes	no	no	no	yes	no
CH-131	Seriate	yes	yes	yes	minor	minor	yes	yes	no	yes	no	yes	no		yes	no	yes	yes	no	no	no	yes	no
CH-132	Por-Seriate	yes	yes	yes	yes	relict	yes	yes	no	yes	no	no	no		yes	yes	yes	yes	yes	no	no	yes	no
CH-133	Phan	yes	yes	yes	yes	no	yes	yes	no	yes	no	yes	no		yes	no	yes	yes	yes	no	yes	no	no
CH-134	Seriate	yes	yes	yes	yes	relict	yes	yes	no	yes	N.D.	N.D.	N.D.		yes	N.D.	yes	yes	N.D.	N.D.	yes	yes	N.D.
CH-135	Seriate	27	18.3	47.4	2.4	0.5	1	1.9	no	0.2	yes	no	no		yes	yes	yes	yes	no	yes	yes	yes	no
CH-138	Por-Seriate	20.4	4.6	47.1	3.7	minor	0.9	3.4	no	0.1	17.8	yes	no		yes	yes	no	yes	no	yes	yes	yes	N.D.
CH-156	Phan	20.1	4.2	48.9	3.2	0.1	2.2	3.8	no	yes	16.8	0.3	0.3		yes	yes	yes	yes	no	no	yes	yes	yes
CH-157	Phan	52.3	2.7	1.8	no	no	1.9	39.3	no	minor	no	1.7	no		yes	no	yes	no	no	no	N.D.	yes	no
CH-158	Por-aph	yes	yes	yes	no	no	yes	yes	no	no	yes	yes	yes		yes	no	no	yes	yes	no	no	yes	no
CH-159	Phan	26.2	15.8	49.8	4.9	0.1	1.2	1.1	?	0.2	no	no	0.2		yes	yes	yes	yes	no	yes	N.D.	no	no
CH-160	Seriate	24.4	12.9	54.2	3.1	minor	0.8	2.9	no	yes	no	no	0.6		yes	yes	yes	yes	yes	yes	yes	no	no
Average	N/A	27.0957	15.0304	39.5261	3.33889	0.3	1.19545	5.99565	0	0.2125	18.1	0.885714	0.611111		N.A.	N.A.	N.A.	N.A.	N.A.	N.A.	N.A.	N.A.	N.A.
Pebble dike intrusive igneous clasts
CH-036A	Por-M	44.7	19.4	26.6	4.8	1	1.1	1.6	0.2	0.2	yes	no	no		yes	yes	yes	no	no	yes	yes	yes	no
CH-036B	Seriate-M	45.4	13	18.4	2	1.3	1.8	17.4	N.D.	0.3	no	no	no		yes	yes	yes	yes	no	yes	yes	yes	N.D.
CH-036C	Seriate-Por	17.4	13.8	46	5.3	0.9	1.5	0.9	N.D.	0.4	13.5	no	no		yes	yes	yes	no	no	yes	yes	yes	N.D.
CH-036D	Por-seriate	32.1	8.8	39.9	5	0.6	2	9.5	no	1.7	0.6	no	no		yes	yes	yes	?	yes	yes	yes	yes	no
CH-036E	Por-M	28.1	12.8	16.4	no	0.2	1.9	23.4	no	minor	16.5	no	yes		yes	no	yes	yes	yes	no	yes	yes	no
CH-061A (LCS)	Por	10	10.5	57.5	4.6	1.1	no	no	minor	0.4	15.4	no	no		yes	yes	no	no	no	yes	yes	yes	N.D.
CH-061A (RP)	Por	9.7	minor	34.5	4.5	0.6	2.5	no	no	yes	47.9	no	no		yes	no	yes	no	no	no	yes	yes	N.D.
CH-062P	Seriate	30.7	12.8	47.7	5	1.2	0.1	0.9	no	1	no	minor	minor		yes	yes	no	minor	no	yes	yes	no	no
CH-062	Phan-Por	18	14	38.5	7.8	0.4	no	0.4	no	0.7	19.1	no	no		yes	no	no	no	no	yes	yes	yes	no
CH-066	Multiple†	yes	yes	yes	yes	yes	yes	yes	yes	yes	yes	N.D.	N.D.		N.D.	N.D.	yes	N.D.	N.D.	N.D.	N.D.	N.D.	N.D.
CH-066 Ex	Phan-seriate	yes	yes	yes	yes	yes	yes	yes	yes	yes	no	no	no		yes	yes	yes	no	no	no	no	yes	no
CH-095A	Phan-seriate	26.7	15.3	51.1	3.5	0.3	1.4	0.9	no	yes	no	no	no		yes	yes	yes	no	no	no	yes	no	no
Average	N/A	26.28	13.3778	37.66	4.72222	0.76	1.5375	6.875	0.2	0.671429	18.8333	N.A.	N.A.		N.A.	N.A.	N.A.	N.A.	N.A.	N.A.	N.A.	N.A.	N.A.
Rhyolites
CH-040	Aph	2.4	2.7	0.3	no	no	0.6	7.4	N.D.	N.D.	86.3	N.D.	N.D.		N.D.	N.D.	N.D.	N.D.	N.D.	N.D.	N.D.	N.D.	N.D.
CH-096	Aph	yes	yes	yes	no	no	N.D.	yes	no	no	yes	yes	no		no	no	yes	yes	no	no	no	N.D.	no
CH-109	N.D.	N.D.	N.D.	N.D.	N.D.	N.D.	N.D.	N.D.	N.D.	N.D.	N.D.	N.D.	N.D.		N.D.	N.D.	N.D.	N.D.	N.D.	N.D.	N.D.	N.D.	N.D.
CH-113	N.D.	N.D.	N.D.	N.D.	N.D.	N.D.	N.D.	N.D.	N.D.	N.D.	N.D.	N.D.	N.D.		N.D.	N.D.	N.D.	N.D.	N.D.	N.D.	N.D.	N.D.	N.D.
CH-136	N.D.	N.D.	N.D.	N.D.	N.D.	N.D.	N.D.	N.D.	N.D.	N.D.	N.D.	N.D.	N.D.		N.D.	N.D.	N.D.	N.D.	N.D.	N.D.	N.D.	N.D.	N.D.
CH-139	N.D.	N.D.	N.D.	N.D.	N.D.	N.D.	N.D.	N.D.	N.D.	N.D.	N.D.	N.D.	N.D.		N.D.	N.D.	N.D.	N.D.	N.D.	N.D.	N.D.	N.D.	N.D.
Mafic enclaves
DCC-4	Por	8.8	9.1	50.3	9.5	1.1	2.1	1.5	7.6	0.1	N.D.	N.D.	N.D.		yes	0.08	N.D.	N.D.	N.D.	1.5	yes	N.D.	yes
CH-153 A	Por	9.9	2.3	55.4	17	3	1.5	minor	10.3	0.1	yes	no	no		yes	yes	no	no	no	yes	yes	yes	N.D.
CH-153 C	Por-Aph	yes	yes	yes	yes	yes	yes	yes	yes	yes	yes	no	no		yes	yes	no	no	no	yes	N.D.	no	yes
CH-153 D	Por-Aph	6.6	0.7	56.6	19.2	2.2	0.8	yes	12.6	0.1	yes	no	no		yes	yes	no	no	no	yes	N.D.	no	N.D.
Average	N/A	8.43333	4.03333	54.1	15.2333	2.1	1.46667	1.5	10.1667	0.1	N.A.	N.A.	N.A.		N.A.	N.A.	N.A.	N.A.	N.A.	N.A.	N.A.	N.A.	N.A.
Note: Abundances given in "minor" indicate they are present in trace amounts, but with no modal percentage. "Relict" implies that the mineral is present only in relict condition. "Yes" and "no" indicate the simple presence or absence of a mineral or feature, with no regard to modal abundance. "N.D." indicates no determination was made.
*Textural term abbreviations are as follows: Phan = phaneritic; Phan-M = phaneritic-megacrystic; Phan-Por = phaneritic with interstitial groundmass; Phan-por-M is phaneritic with interstitial groundmass and megacrysts; Por = porphyritic; Por-aph = porphyritic-aphanitic; Por-M is porphyritic with megacrysts; Por-aph-M is porphyritic-aphanitic with megacrysts; Por-Seriate is porphyritic to seriate;…
†This sample has two embedded clasts, each with different texture.
